# Supplementary material for: Hydrogen bonded anion ribbons, networks and clusters and sulfur–anion interactions in novel radical cation salts of BEDT-TTF with sulfamate, pentaborate and bromide
Source: Royal Society of Chemistry journal article supplement (doi:10.1039/c3dt32430c), 2013-01-01
Supplement: c3dt32430c.pdf [file c3dt32430c.pdf]

## Supplementary Material for:

# Hydrogen Bonded Anion Ribbons, Networks and Clusters and Sulfur-Anion Interactions in Novel Radical Cation Salts of BEDT-TTF with Sulfamate, Pentaborate and Bromide.

Andrew C. Brooks, Lee Martin, Peter Day, Elsa B. Lopes, Manuel Almeida, Koichi Kikuchi, Wataru Fujita, Kota Sasamori, Hiroki Aktusu, John D. Wallis\*

### RAMAN IMAGES FOR RADICAL CATION SALTS.

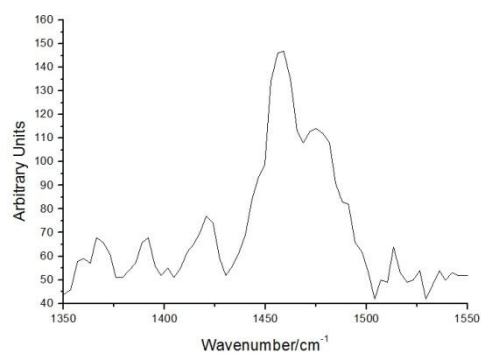

$(\text{BEDT-TTF})_3(\text{SO}_3\text{NH}_2)_2(\text{H}_2\text{O})_2$

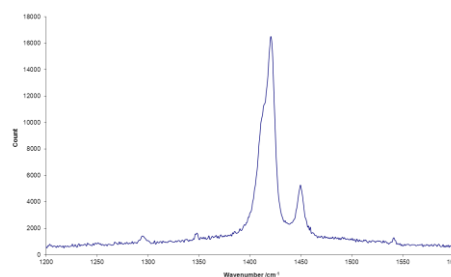

BEDT.Br

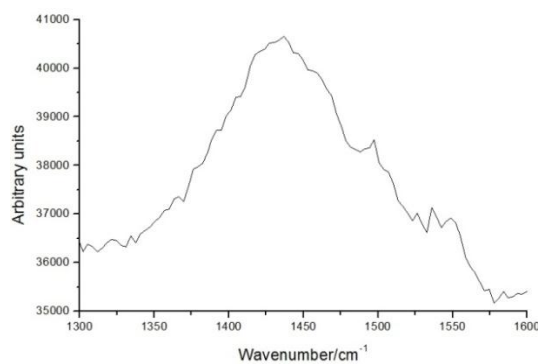

$\text{ET}_5[\text{Br}_4(\text{H}_5\text{O}_2)]$

### CRYSTAL STRUCTURE OF (BEDT-TTF)<sub>3</sub>(SO<sub>3</sub>NH<sub>2</sub>)<sub>2</sub>(H<sub>2</sub>O)<sub>2</sub> AT ROOM TEMPERATURE.

*Crystal data:* 3C<sub>10</sub>H<sub>8</sub>S<sub>8</sub>·2SO<sub>2</sub>NH<sub>2</sub>·2H<sub>2</sub>O, *M<sub>r</sub>* = 1382.14, triclinic, *a* = 6.761(8), *b* = 11.861(14), *c* = 16.726(16) Å, *α* = 90.86(4), *β* = 91.18(5), *γ* = 100.95(5)°, *V* = 1316(3) Å<sup>3</sup>, *Z* = 1, *P*-1, *D<sub>c</sub>* = 1.743 g cm<sup>-3</sup>, *μ*(MoKα) = 1.101 mm<sup>-1</sup>, *T* = 300(2) K, *R*<sub>int</sub> 0.080, 5701 unique reflections, 1505 with *F* > 4σ(*F*), *R* = 0.125, *wR* = 0.358.

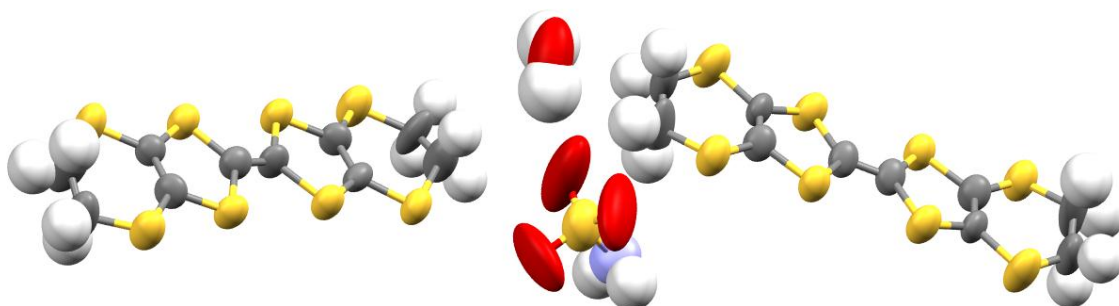

Figure A. Molecular structure of (BEDT-TTF)<sub>3</sub>(SO<sub>3</sub>NH<sub>2</sub>)<sub>2</sub>(H<sub>2</sub>O)<sub>2</sub> at 300 K with anisotropic displacement parameters drawn at the 50% level.

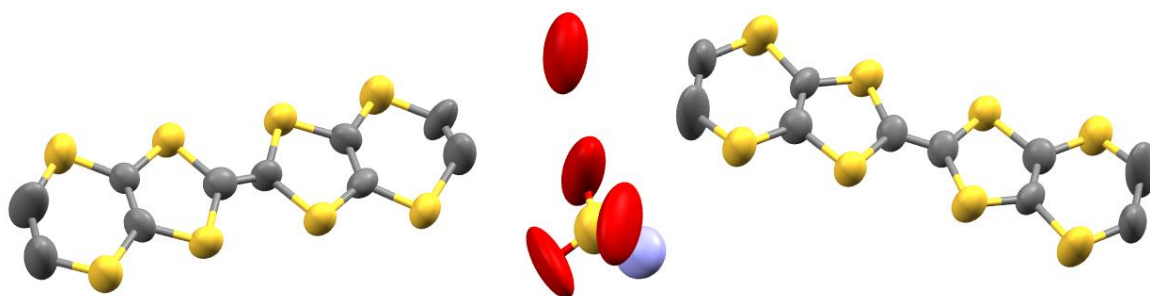

Figure B. Molecular structure of (BEDT-TTF)<sub>3</sub>(SO<sub>3</sub>NH<sub>2</sub>)<sub>2</sub>(H<sub>2</sub>O)<sub>2</sub> at 300 K with anisotropic displacement parameters drawn at the 50% level with H atoms omitted.

### CRYSTAL STRUCTURE OF (BEDT-TTF)<sub>3</sub>.Br AT ROOM TEMPERATURE.

*Crystal data:* C<sub>10</sub>H<sub>8</sub>S<sub>8</sub>.Br,  $M_r = 464.55$ , monoclinic,  $a = 12.8238(16)$ ,  $b = 11.0175(10)$ ,  $c = 11.2402(11)$  Å,  $\beta = 103.712(11)^\circ$ ,  $V = 1542.8(3)$  Å<sup>3</sup>,  $Z = 4$ , C2/c,  $D_c = 2.00$  g/cm<sup>3</sup>,  $\mu(\text{MoK}\alpha) = 3.73$  mm<sup>-1</sup>,  $T = 294(2)$  K, 1770 unique reflections, 1527 with  $F > 4\sigma(F)$ ,  $R = 0.060$ ,  $wR = 0.104$ .

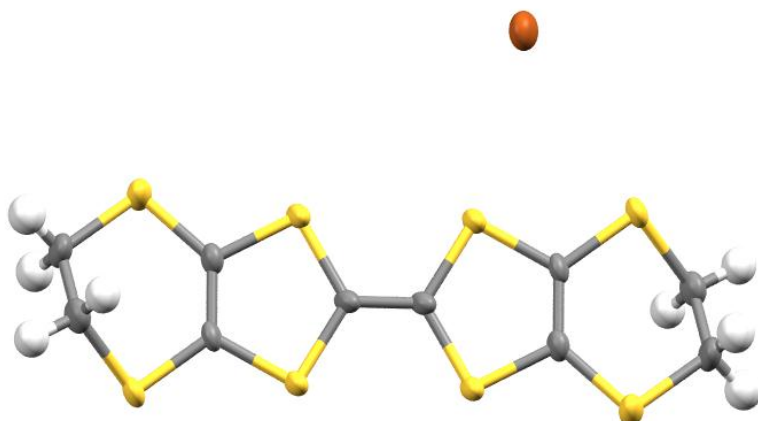

Figure C. Molecular structure of BEDT-TTF.Br at 294 K with anisotropic displacement parameters drawn at the 50% level.
